# Supplementary material for: Metabolites profiling of Sapota fruit pulp via a multiplex approach of gas and ultra performance liquid chromatography/mass spectroscopy in relation to its lipase inhibition effect
Source: PeerJ. 2024 Aug 29;12:e17914. doi: 10.7717/peerj.17914 (PMC11366232; doi:10.7717/peerj.17914)
Supplement: Supplemental Information 8 [file peerj-12-17914-s008.xlsx]

## Sheet: ANTIOXIDANT
	Antioxidant	in vitro
	Observation:
	Sample No.	6
	Sample ID	SP
	DPPH	1.82137
		1.42104
		1.60943
	avg	1.61728	mgTE/g w
	stdev ±	0.200281
	ABTS	1.3658
		1.57646
		1.51627
	avg	1.48618	mgTE/g w
	stdev ±	0.10851						nd - no response found above our LOQ
	FRAP	3.46835
		3.74252
		3.52928
	avg	3.58005	mgTE/g w
	stdev ±	0.143962
	TPC Folin	6.85855
		6.85855
		6.6464
	avg	6.78783	mgGAE/g w
	stdev ±	0.12248
	TFC AlCl3	nd
		nd
		nd
	avg	nd	mgRE/g w
	stdev ±	nd

## Sheet: ALPHA-GLUCOSIDASE
Results expressed as initial weighed concentration														Results expressed as dilluted concentration in microplate (initial / 3)
Alpha-glucosidase - Dataset 2														Alpha-glucosidase - Dataset 2
Sample no.	Sample ID	IC50 (mg/ml) - replicates			Final	±	St.dev.	IC50 (μg/ml) - replicates			Final			Sample no.	Sample ID	IC50 (mg/ml) - replicates			Final	±	St.dev.	IC50 (μg/ml) - replicates			Final
		1	2	3				1	2	3						1	2	3				1	2	3
7	SP				NA	±					NA			7	SP					±					NA
Acarbose					0.4891									Acarbose					0.163033
Note: NA - No Activity - at the maximal test concentration (10 mg/mL), and with following dillutions, the sample showed no significant inhibitory activity against alpha-glucosidase

## Sheet: LIPASE
Results expressed as initial weighed concentration														Results expressed as dilluted concentration in microplate (initial / 2)
Lipase - Dataset 2														Lipase - Dataset 2
Sample no.	Sample ID	IC50 (mg/ml) - replicates			Final	±	St dev	IC50 (μg/ml)			Final			Sample no.	Sample ID	IC50 (mg/ml) - replicates			Final	±	St dev	IC50 (μg/ml)			Final
		1	2	3		±		1	2	3						1	2	3		±		1	2	3
7	SP	4.706	4.722	3.842	4.42333	±	0.503513	4706	4722	3842	4423.33			7	SP	2.353	2.361	1.921	2.21167	±	0.251756	2353	2361	1921	2211.67
Orlistat					0.1603						160.36			Orlistat			0.08015
